# Supplementary material
Source: PubMed Central journal article supplement (PMC5532069)
Supplement: NIHMS874021-supplement-1.pdf [file NIHMS874021-supplement-1.pdf]

# Supplemental figures and tables for “Tension stimulation drives tissue formation in scaffold-free systems”

## **Authors**

Jennifer K. Lee, Le W. Huwe, Nikolaos Paschos, Ashkan Aryaei, Courtney A. Gegg, Jerry C. Hu, Kyriacos A. Athanasiou

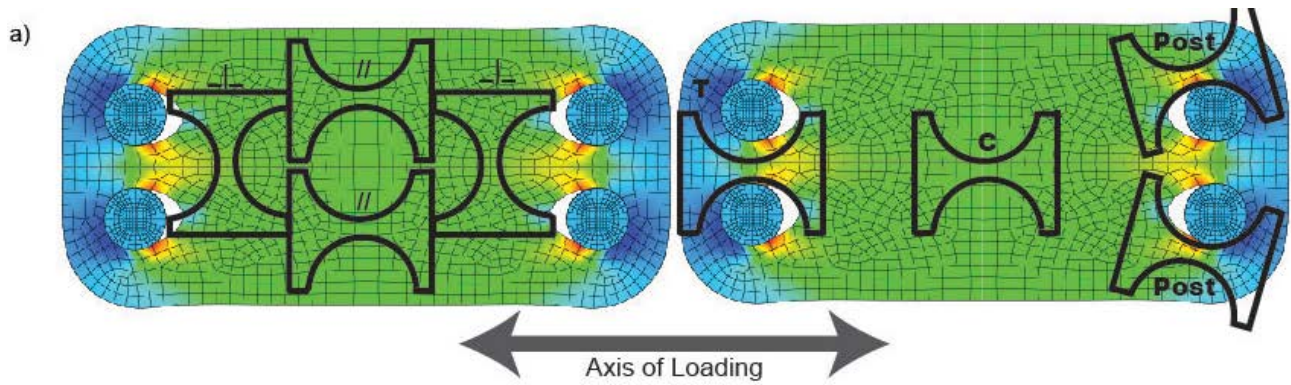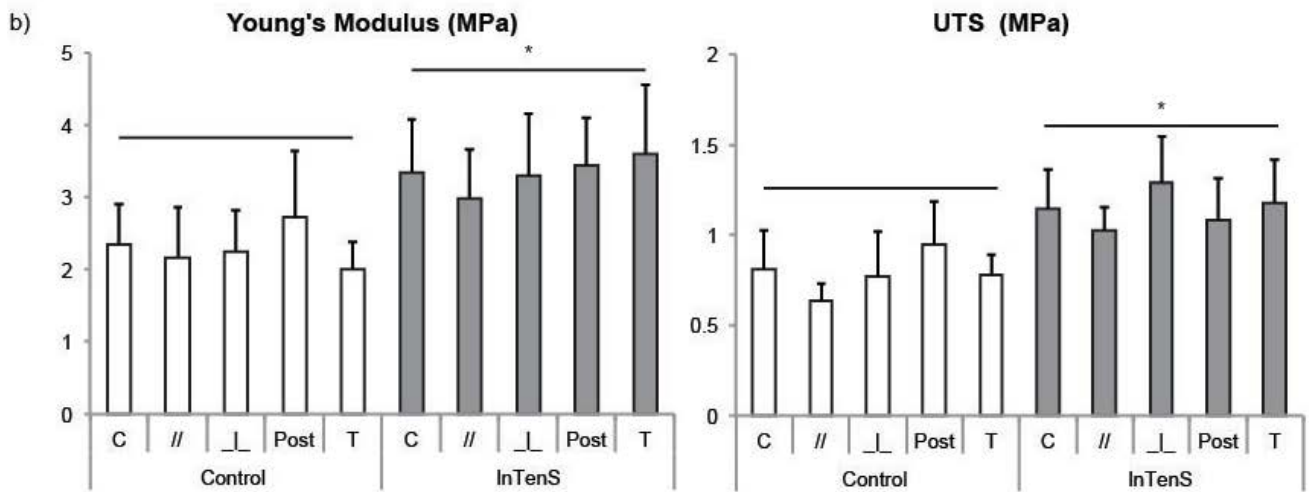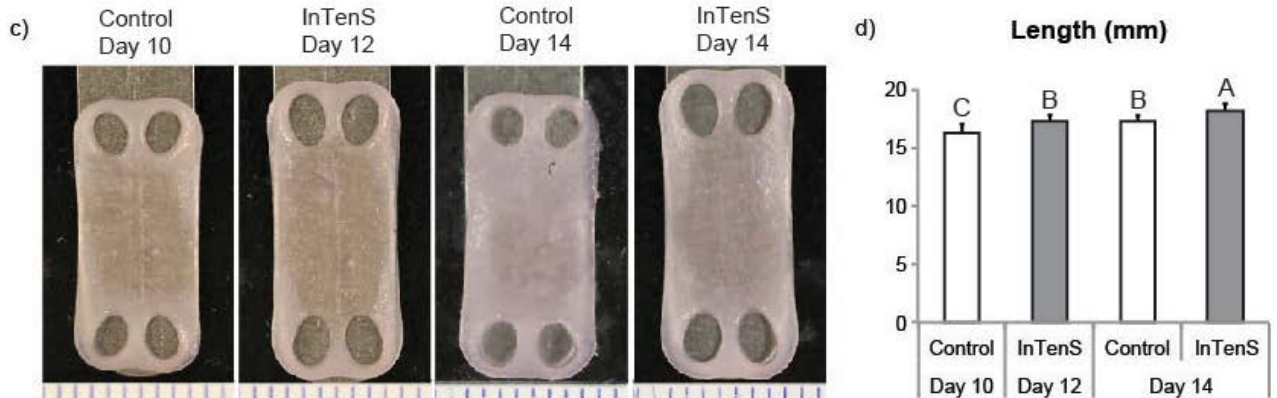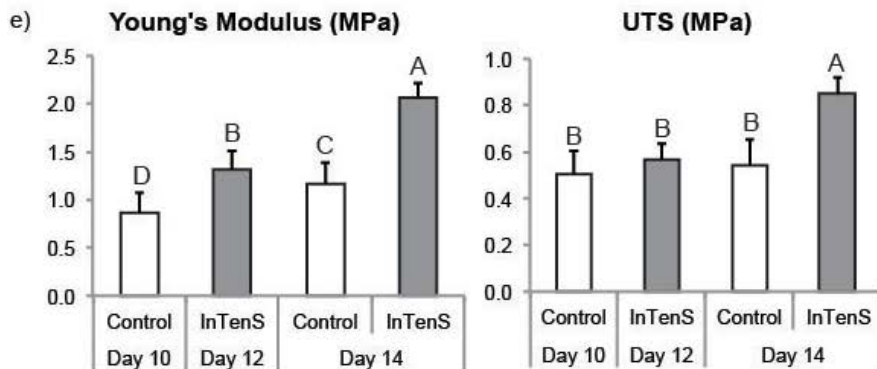

**Supplemental Figure 1. Topographical assessment demonstrates tissue uniformity, while time-lapse analysis indicates significant changes by Day 12.**

Tensile properties of neocartilage were assessed in various locations, as indicated by the outlines of dog-bone specimens (a), and demonstrated no significant regional differences within the untreated or InTenS-treated groups (b). Student's t-test was performed to compare control and InTenS-treated groups,  $*p < 0.05$ . X-axis legend matches dog-bones indicated in (a). Across all regions, InTenS led to significantly higher Young's modulus and UTS compared to untreated controls. Neocartilage was assessed on Days 10, 12, and 14 to elucidate the morphological (c,d) and mechanical (e) changes during the InTenS process. By Day 14, InTenS-treated neocartilage constructs were significantly longer than untreated controls. Both Young's modulus and UTS were increased at Day 14 in the InTenS groups over untreated controls. One-way ANOVAs, followed by a Tukey's *post hoc* test, were performed to statistically assess the results. Groups not connected by the same letter are statistically significant. Data are represented as mean $\pm$ SD.

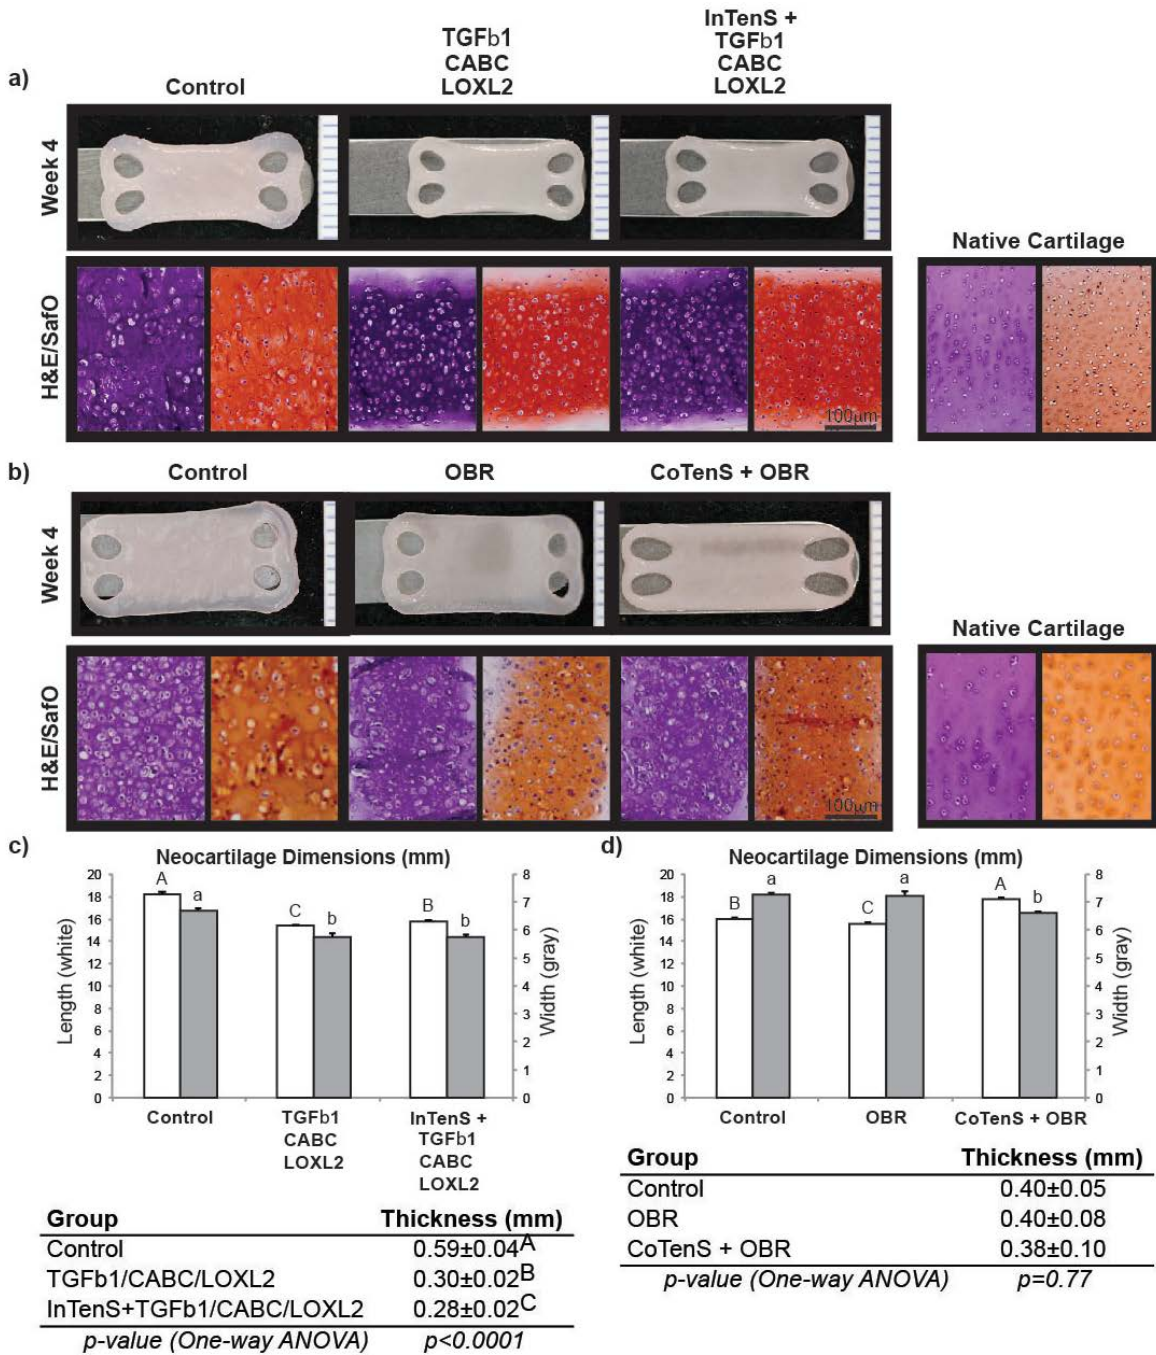

**Supplemental Figure 2. Morphological differences are present in week 4 neocartilage prior to *in vivo* implantation, as well as in CoTenS-treated tissues.**

Control, InTenS + TGFβ1/CABC/LOXL2-treated, and TGFβ1/CABC/LOXL2-treated neocartilage exhibited a hyaline-like appearance (a). TGFβ1/CABC/LOXL2-treated and InTenS + TGFβ1/CABC/LOXL2-treated groups were markedly smaller than untreated controls. Formalin-fixed tissue sections were stained with H&E and Safranin-O/Fast Green to visualize matrix distribution and GAG deposition. Rich matrix deposition was present in all groups. CoTenS + OBR and OBR alone-treated neocartilage also exhibited a hyaline-like appearance (b). The differences in morphological parameters were confirmed statistically, with tension stimulation leading to significantly longer

neocartilage than those treated with bioactive agents alone (c,d). One-way ANOVAs, followed by a Tukey's *post hoc* test, were used to statistically compare the groups. Groups not connected by the same letter are statistically significant. Data are represented as mean $\pm$ SD. Tick marks in (a) and (b) represent 1mm.

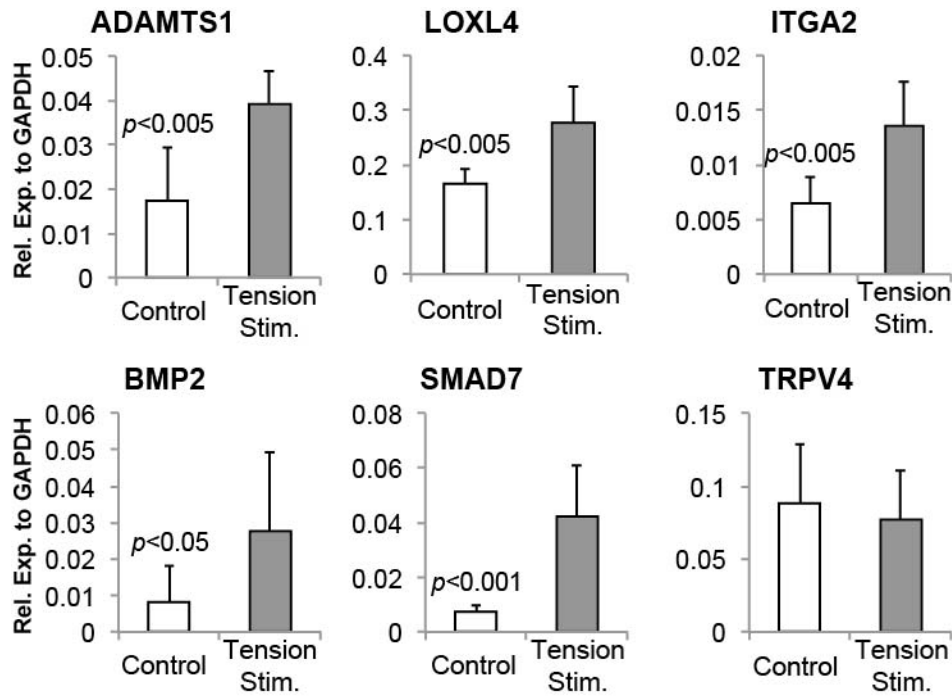

**Supplemental Figure 3. Preliminary gene expression analysis to confirm microarray results.**

qRT-PCR confirmed up-regulation in genes related to matrix remodeling (i.e., ADAMTS1, LOXL4), cell-matrix interactions (i.e., integrin  $\alpha 2$ ), and the BMP signaling pathway (i.e., BMP2, SMAD7).

Tension stimulation did not upregulate TRPV4 expression.

## Supplemental Table 1A and 1B. Mechanical and biochemical properties of InTenS-treated neocartilage.

This portion of the work comprised a series of tissue engineering studies evaluating the effect of 1) InTenS alone, 2) InTenS + TGFβ1, 3) InTenS + TGFβ1/LOXL2, and 4) InTenS + TGFβ1/LOXL2/CABC. Combination treatments progressively enhanced the tensile and biochemical properties of engineered neocartilage (1A). Anisotropy of tensile properties in engineered tissues was achieved with InTenS (1B). GAG and collagen contents (mg) were normalized by tissue wet weight (mg). Student's t-test was used for all studies except InTenS + TGFβ1, where a two-way ANOVA was applied, followed by Tukey's *post hoc* test,  $p < 0.05$ . Data are represented as mean ± SD.

| Study                     | Groups                     | Tensile Testing       |                       | Compressive Testing     |                        | Biochemical Properties           |                       |                         |                         |                          |                          |                            |
|---------------------------|----------------------------|-----------------------|-----------------------|-------------------------|------------------------|----------------------------------|-----------------------|-------------------------|-------------------------|--------------------------|--------------------------|----------------------------|
|                           |                            | Young's modulus (MPa) | UTS (MPa)             | Aggregate modulus (kPa) | Shear modulus (kPa)    | Construct wet weight, WW (mg/mg) | Hydration (%)         | Total GAG (mg)          | Total collagen (mg)     | Cells (10 <sup>6</sup> ) | GAG/WW (mg/mg)           | Collagen/WW (mg/mg)        |
| InTenS alone              | Control                    | 1.3±0.3               | 0.3±0.1               | 113±56                  | 53.1±26.2              | 82.09±2.53                       | 87.0±0.3              | 4.50±0.12               | 1.65±0.10               | 11.7±1.4                 | 0.055±0.002              | 0.0204±0.0006              |
|                           | InTenS                     | 1.8±0.5               | 0.4±0.1               | 165±43                  | 68.3±17.4              | 72.18±4.48                       | 72.2±4.5              | 4.22±0.27               | 1.54±0.13               | 8.4±0.7                  | 0.059±0.002              | 0.0214±0.0019              |
|                           | Statistics (±InTenS)       | $p=0.003$             | $p=0.002$             | $p=0.04$                | $p=0.2$                | $p<0.0001$                       | $p=0.02$              | $p=0.02$                | $p=0.07$                | $p=0.001$                | $p=0.001$                | $p=0.2$                    |
| InTenS +TGFβ1             | Control                    | 2.6±0.8 <sup>C</sup>  | 0.8±0.3 <sup>C</sup>  | 44±9 <sup>B</sup>       | 15.9±4.3 <sup>B</sup>  | 46.11±7.17                       | 86.2±0.7 <sup>A</sup> | 2.65±0.50 <sup>AB</sup> | 0.82±0.17 <sup>B</sup>  | 5.0±0.6 <sup>C</sup>     | 0.063±0.005 <sup>A</sup> | 0.0194±0.0010 <sup>C</sup> |
|                           | InTenS                     | 3.5±0.7 <sup>B</sup>  | 1.0±0.2 <sup>BC</sup> | 72±21 <sup>A</sup>      | 25.1±9.3 <sup>B</sup>  | 46.51±3.92                       | 85.2±0.4 <sup>B</sup> | 3.15±0.39 <sup>A</sup>  | 1.00±0.10 <sup>AB</sup> | 5.6±0.6 <sup>BC</sup>    | 0.068±0.004 <sup>A</sup> | 0.0215±0.0005 <sup>B</sup> |
|                           | TGFβ1                      | 3.3±0.9 <sup>BC</sup> | 1.2±0.1 <sup>B</sup>  | 66±18 <sup>AB</sup>     | 25.9±5.8 <sup>AB</sup> | 44.80±2.67                       | 85.4±0.5 <sup>B</sup> | 2.26±0.29 <sup>B</sup>  | 1.06±0.15 <sup>AB</sup> | 6.2±0.4 <sup>AB</sup>    | 0.050±0.004 <sup>B</sup> | 0.0235±0.0018 <sup>A</sup> |
|                           | InTenS + TGFβ1             | 6.2±0.8 <sup>A</sup>  | 2.1±0.2 <sup>A</sup>  | 81±6 <sup>A</sup>       | 35.6±2.9 <sup>A</sup>  | 46.76±1.59                       | 85.4±0.5 <sup>B</sup> | 2.54±0.14 <sup>B</sup>  | 1.15±0.04 <sup>A</sup>  | 6.7±0.5 <sup>A</sup>     | 0.054±0.002 <sup>B</sup> | 0.0247±0.0008 <sup>A</sup> |
|                           | Statistics (One-way ANOVA) | $p<0.0001$            | $p<0.0001$            | $p<0.008$               | $p<0.0001$             | $p=0.5$                          | $p=0.005$             | $p=0.0006$              | $p=0.02$                | $p<0.0001$               | $p<0.0001$               | $p<0.0001$                 |
| InTenS + TGFβ1/LOXL2      | Control                    | 2.8±0.6               | 1.0±0.1               | 69±10                   | 29.0±4.5               | 54.32±2.33                       | 86.4±0.3              | 2.74±0.13               | 0.99±0.11               | 7.1±0.4                  | 0.051±0.002              | 0.0177±0.0009              |
|                           | InTenS + TGFβ1             | 5.6±0.4               | 2.1±0.3               | 115±17                  | 46.1±11.3              | 39.55±0.76                       | 84.7±0.8              | 1.92±0.07               | 0.92±0.07               | 8.0±0.7                  | 0.050±0.001              | 0.0232±0.0020              |
|                           | InTenS + TGFβ1/LOXL2       | 8.0±1.5               | 3.3±0.5               | 44±14                   | 10.8±1.7               | 35.51±1.83                       | 86.6±0.5              | 0.98±0.13               | 0.84±0.06               | 7.3±0.5                  | 0.028±0.003              | 0.0240±0.0008              |
|                           | Statistics (±LOXL2)        | $p<0.0001$            | $p<0.0001$            | $p<0.0001$              | $p<0.0001$             | $p=0.0002$                       | $p=0.0004$            | $p<0.0001$              | $p=0.06$                | $p=0.06$                 | $p<0.0001$               | $p=0.3$                    |
| InTenS + TGFβ1/LOXL2/CABC | Control                    | 1.9±0.4               | 0.7±0.1               | 158±70                  | 69.1±21.6              | 75.52±4.02                       | 88.0±0.5              | 3.78±0.32               | 1.25±0.15               | 5.5±0.4                  | 0.050±0.003              | 0.0171±0.0011              |
|                           | InTenS + TGFβ1/LOXL2       | 5.0±1.1               | 2.1±0.4               | 62±15                   | 23.8±5.5               | 51.04±3.85                       | 88.0±0.4              | 1.36±0.16               | 1.12±0.15               | 3.9±0.5                  | 0.026±0.001              | 0.0237±0.0026              |
|                           | InTenS + TGFβ1/LOXL2/CABC  | 7.6±0.4               | 2.6±0.1               | 107±18                  | 38.8±11.0              | 38.21±2.89                       | 83.7±0.1              | 1.79±0.14               | 1.05±0.12               | 3.3±0.5                  | 0.047±0.003              | 0.0278±0.0009              |
|                           | Statistics (±CABC)         | $p<0.0001$            | $p=0.0002$            | $p=0.002$               | $p=0.02$               | $p<0.0001$                       | $p<0.0001$            | $p<0.0002$              | $p=0.3$                 | $p=0.004$                | $p<0.0001$               | $p<0.0001$                 |

|                           | Groups                   | Young's Modulus (MPa)                                                                                     |               | UTS (MPa) |               |
|---------------------------|--------------------------|-----------------------------------------------------------------------------------------------------------|---------------|-----------|---------------|
|                           |                          | Parallel                                                                                                  | Perpendicular | Parallel  | Perpendicular |
| InTenS + TGFβ1/LOXL2/CABC | Control                  | 1.7±0.5                                                                                                   | 2.0±0.3       | 0.6±0.1   | 0.7±0.2       |
|                           | InTenS +TGFβ1/LOXL2      | 5.7±0.6**                                                                                                 | 3.9±0.4       | 2.3±0.3*  | 1.8±0.3       |
|                           | InTenS +TGFβ1/LOXL2/CABC | 8.4±0.9*                                                                                                  | 7.0±0.7       | 2.6±0.1   | 2.6±0.1       |
|                           | Statistics               | Student's t-test, parallel versus perpendicular directions within groups (* $p < 0.05$ , ** $p < 0.005$ ) |               |           |               |

**Supplemental Table 2: Mechanical and biochemical properties of 4-week-old InTenS-treated neocartilage.**

Prior to implantation, neocartilage replicated the results of prior experiments (Supplemental Table 1). Neocartilage treated with only bioactive agents exhibited significantly enhanced mechanical and biochemical properties as compared to untreated controls. Please note that the tensile data presented here are the averages of the parallel and perpendicular directions; for parallel only data showing significant effects of InTenS, please see Figure 4d. As evident in Supplemental Table 3, the effects of CoTenS are even more pronounced. GAG and collagen contents (mg) were normalized by tissue wet weight (mg). One-way ANOVAs, followed by Tukey's *post hoc* test, were used to statistically assess the results. Groups not connected by the same letter are statistically significant. Data are represented as mean±SD.

| Supplemental Table 2: Mechanical and Biochemical Properties of 4-week-old InTenS-Treated Neocartilage |                       |                      |                         |                         |                                  |                         |                        |                        |                          |                |                     |
|-------------------------------------------------------------------------------------------------------|-----------------------|----------------------|-------------------------|-------------------------|----------------------------------|-------------------------|------------------------|------------------------|--------------------------|----------------|---------------------|
| Groups                                                                                                | Tensile Testing       |                      | Compressive Testing     |                         | Biochemical Properties           |                         |                        |                        |                          |                |                     |
|                                                                                                       | Young's modulus (MPa) | UTS (MPa)            | Aggregate modulus (kPa) | Shear modulus (kPa)     | Construct wet weight, WW (mg/mg) | Hydration (%)           | Total GAG (mg)         | Total collagen (mg)    | Cells (10 <sup>6</sup> ) | GAG/WW (mg/mg) | Collagen/WW (mg/mg) |
| Control                                                                                               | 1.4±0.4 <sup>B</sup>  | 0.4±0.1 <sup>B</sup> | 124±46                  | 50.1±13.9 <sup>A</sup>  | 91.54±3.11 <sup>A</sup>          | 87.63±0.51 <sup>A</sup> | 5.47±0.90 <sup>A</sup> | 2.28±0.51 <sup>A</sup> | 9.0±0.3 <sup>A</sup>     | 0.060±0.009    | 0.0228±0.0016       |
| TGFβ1/LOXL2/CABC                                                                                      | 7.5±1.0 <sup>A</sup>  | 2.6±0.4 <sup>A</sup> | 136±54                  | 44.4±10.7 <sup>AB</sup> | 37.22±1.32 <sup>B</sup>          | 83.03±0.39 <sup>B</sup> | 2.37±0.16 <sup>B</sup> | 0.87±0.08 <sup>B</sup> | 4.7±0.6 <sup>B</sup>     | 0.064±0.004    | 0.0233±0.0013       |
| InTenS + TGFβ1/LOXL2/CABC                                                                             | 7.2±0.7 <sup>A</sup>  | 2.6±0.2 <sup>A</sup> | 102±36                  | 30.9±11.3 <sup>B</sup>  | 34.83±0.74 <sup>B</sup>          | 82.70±0.63 <sup>B</sup> | 2.10±0.13 <sup>B</sup> | 0.81±0.05 <sup>B</sup> | 4.8±0.7 <sup>B</sup>     | 0.062±0.003    | 0.0234±0.0015       |
| Statistics (One-way ANOVA)                                                                            | <i>p</i> <0.0001      | <i>p</i> <0.0001     | <i>p</i> =0.5           | <i>p</i> =0.04          | <i>p</i> <0.0001                 | <i>p</i> <0.0001        | <i>p</i> <0.0001       | <i>p</i> <0.0001       | <i>p</i> <0.0001         | <i>p</i> =0.5  | <i>p</i> =0.8       |



### Supplemental Table 3: Mechanical and biochemical properties of neocartilage treated with CoTenS.

To fully examine the effects of tension as a stimulus, CoTenS was applied in the presence of an optimized bioactive regimen (OBR). CoTenS plays a critical role in generating significantly enhanced tensile properties and anisotropy, above and beyond those of OBR alone. GAG and collagen contents (mg) were normalized by tissue wet weight (mg). One-way ANOVA, followed by Tukey's *post hoc* test, was applied to examine the effects of OBR and CoTenS + OBR treatment. Groups not connected by the same letter are statistically significant. Student's t-test was used to assess anisotropic effects of regimens. Data are represented as mean±SD.

| Supplemental Table 3: Mechanical and Biochemical Properties of CoTenS-Treated Neocartilage |                                                                                               |                      |                         |                       |                                  |               |                        |                     |                          |                           |                             |
|--------------------------------------------------------------------------------------------|-----------------------------------------------------------------------------------------------|----------------------|-------------------------|-----------------------|----------------------------------|---------------|------------------------|---------------------|--------------------------|---------------------------|-----------------------------|
| Groups                                                                                     | Tensile Testing                                                                               |                      | Compressive Testing     |                       | Biochemical Properties           |               |                        |                     |                          |                           |                             |
|                                                                                            | Young's modulus (MPa)                                                                         | UTS (MPa)            | Aggregate modulus (kPa) | Shear modulus (kPa)   | Construct wet weight, WW (mg/mg) | Hydration (%) | Total GAG (mg)         | Total collagen (mg) | Cells (10 <sup>6</sup> ) | GAG/WW (mg/mg)            | Collagen/WW (mg/mg)         |
| Control                                                                                    | 1.1±0.3 <sup>C</sup>                                                                          | 0.4±0.1 <sup>C</sup> | 215±59 <sup>A</sup>     | 82.2±7.2 <sup>A</sup> | 74.34±9.01 <sup>A</sup>          | 86.3±1.5      | 4.46±0.88 <sup>A</sup> | 1.01±0.12           | 7.3±0.6 <sup>A</sup>     | 0.061±0.010 <sup>A</sup>  | 0.0136±0.0024 <sup>B</sup>  |
| OBR                                                                                        | 3.1±1.1 <sup>B</sup>                                                                          | 1.4±0.5 <sup>B</sup> | 148±22 <sup>B</sup>     | 55.4±8.6 <sup>B</sup> | 50.61±10.10 <sup>B</sup>         | 84.2±1.1      | 2.16±0.21 <sup>B</sup> | 0.94±0.19           | 3.7±0.9 <sup>B</sup>     | 0.046±0.004 <sup>AB</sup> | 0.0185±0.0040 <sup>AB</sup> |
| CoTenS + OBR                                                                               | 5.1±2.0 <sup>A</sup>                                                                          | 1.8±0.6 <sup>A</sup> | 199±33 <sup>AB</sup>    | 44.3±5.6 <sup>C</sup> | 42.54±8.42 <sup>B</sup>          | 85.9±6.7      | 1.75±0.83 <sup>B</sup> | 0.97±0.19           | 3.6±1.6 <sup>B</sup>     | 0.040±0.015 <sup>B</sup>  | 0.0229±0.0039 <sup>A</sup>  |
| <i>Statistics (One-way ANOVA)</i>                                                          | <i>p</i> <0.0001                                                                              | <i>p</i> <0.0001     | <i>p</i> =0.03          | <i>p</i> <0.0001      | <i>p</i> <0.0001                 | <i>p</i> =0.7 | <i>p</i> =0.0003       | <i>p</i> =0.7       | <i>p</i> <0.0001         | <i>p</i> =0.03            | <i>p</i> <0.0001            |
| Anisotropy                                                                                 | Young's Modulus (MPa)                                                                         |                      | UTS (MPa)               |                       |                                  |               |                        |                     |                          |                           |                             |
|                                                                                            | Parallel                                                                                      | Perpendicular        | Parallel                | Perpendicular         |                                  |               |                        |                     |                          |                           |                             |
| Control                                                                                    | 1.1±0.5                                                                                       | 1.0±0.4              | 0.4±0.2                 | 0.4±0.1               |                                  |               |                        |                     |                          |                           |                             |
| OBR                                                                                        | 2.8±1.2                                                                                       | 3.3±1.1              | 1.3±0.6                 | 1.5±0.5               |                                  |               |                        |                     |                          |                           |                             |
| CoTenS + OBR                                                                               | 6.4±2.2 <sup>**</sup>                                                                         | 3.8±0.6              | 2.3±0.7 <sup>**</sup>   | 1.4±0.3               |                                  |               |                        |                     |                          |                           |                             |
| <i>Statistics</i>                                                                          | Student's t-test, parallel versus perpendicular directions within groups (** <i>p</i> <0.005) |                      |                         |                       |                                  |               |                        |                     |                          |                           |                             |

**Supplemental Table 4: Mechanical and biochemical properties of human neocartilage treated with CoTenS.**

To test the translational potential of tension stimulation, CoTenS was applied to neocartilage generated from a clinically meaningful cell source—human articular chondrocytes. CoTenS significantly enhanced neocartilage properties beyond an optimized bioactive regimen alone, and beyond that of untreated neocartilage. GAG and collagen contents (mg) were normalized by tissue wet weight (mg). One-way ANOVAs, followed by Tukey’s *post hoc* test, were used to statistically assess the results. Groups not connected by the same letter are statistically significant. Data are represented as mean±SD.

| Supplemental Table 4: Mechanical and Biochemical Properties of Human AC-derived Neocartilage |                       |                      |                         |                       |                                  |               |                        |                     |                          |                |                     |
|----------------------------------------------------------------------------------------------|-----------------------|----------------------|-------------------------|-----------------------|----------------------------------|---------------|------------------------|---------------------|--------------------------|----------------|---------------------|
| Groups                                                                                       | Tensile Testing       |                      | Compressive Testing     |                       | Biochemical Properties           |               |                        |                     |                          |                |                     |
|                                                                                              | Young's modulus (MPa) | UTS (MPa)            | Aggregate modulus (kPa) | Shear modulus (kPa)   | Construct wet weight, WW (mg/mg) | Hydration (%) | Total GAG (mg)         | Total collagen (mg) | Cells (10 <sup>6</sup> ) | GAG/WW (mg/mg) | Collagen/WW (mg/mg) |
| Control                                                                                      | 0.6±0.1 <sup>B</sup>  | 0.3±0.1 <sup>B</sup> | 22.3±12.5 <sup>B</sup>  | 9.4±5.8 <sup>B</sup>  | 18.76±0.90 <sup>C</sup>          | 86.8±4.3      | 0.23±0.12 <sup>B</sup> | 0.36±0.12           | 6.7±2.4                  | 0.013±0.006    | 0.0193±0.0063       |
| OBR                                                                                          | 1.2±0.5 <sup>B</sup>  | 0.5±0.3 <sup>B</sup> | 30.4±23.7 <sup>B</sup>  | 10.9±8.6 <sup>B</sup> | 28.57±2.91 <sup>AB</sup>         | 77.1±10.8     | 0.57±0.26 <sup>B</sup> | 0.80±0.25           | 9.2±1.8                  | 0.020±0.010    | 0.0282±0.0084       |
| CoTenS + OBR                                                                                 | 2.3±0.7 <sup>A</sup>  | 1.2±0.5 <sup>A</sup> | 67.0±12.1 <sup>A</sup>  | 33.3±6.2 <sup>A</sup> | 31.93±2.19 <sup>A</sup>          | 86.9±4.6      | 1.01±0.24 <sup>A</sup> | 0.98±0.27           | 8.8±3.1                  | 0.032±0.009    | 0.0309±0.0089       |
| <i>Statistics (One-way ANOVA)</i>                                                            | <i>p=0.004</i>        | <i>p=0.006</i>       | <i>p=0.0008</i>         | <i>p&lt;0.0001</i>    | <i>p&lt;0.0001</i>               | <i>p=0.1</i>  | <i>p&lt;0.0005</i>     | <i>p=0.1</i>        | <i>p=0.3</i>             | <i>p=0.1</i>   | <i>p=0.1</i>        |

### Supplemental Table 5: Primers used in qRT-PCR.

Forward and reverse primers used for qRT-PCR analysis. Primers were designed using the Primer3 tool.

| Supplemental Table 5: Primers used in qRT-PCR |                  |                       |
|-----------------------------------------------|------------------|-----------------------|
| Gene                                          | Primer Direction | Sequence              |
| ADAMTS1                                       | Forward          | ACACCGAACAGGAACTGGAA  |
|                                               | Reverse          | ATGGACTGGTCAGCCACAA   |
| BMP2                                          | Forward          | CCCCTACATGCTGGACTTGT  |
|                                               | Reverse          | GATTCTTCGTGATGGAAGCTG |
| GAPDH                                         | Forward          | AAGTTCAACGGCACAGTCAA  |
|                                               | Reverse          | GATCTCGCTCCTGGAAGATG  |
| ITGA2                                         | Forward          | GGTGACCAGATTGGCTCCTA  |
|                                               | Reverse          | GTGCACCTACCAAGAGCACA  |
| LOXL4                                         | Forward          | CACAGGCACTACCACAGCAT  |
|                                               | Reverse          | GAGCCGTTGAGAGTGAGGAG  |
| SMAD7                                         | Forward          | GTCAAGAGGCTGTGTTGCTG  |
|                                               | Reverse          | GGGGCTAGTTCGCAGAGTC   |
| TRPV4                                         | Forward          | ACATCTGGAAGCTGCAGTGG  |
|                                               | Reverse          | ATTCACCGGAGCGGAAG     |

**Supplemental Table 6: Microarray analysis revealed significant up-regulation of genes in response to InTenS.**

Microarray results were filtered based on a fold-change >2 and a *p*-value <0.05. Changes in select genes of interest were confirmed via qRT-PCR (Figure 3).

| <b>Supplemental Table 6.</b>                                               |                 |                    |                                                                                                      |
|----------------------------------------------------------------------------|-----------------|--------------------|------------------------------------------------------------------------------------------------------|
| <b>Microarray results of changes in gene expression elicited by InTenS</b> |                 |                    |                                                                                                      |
| <b>Changes to bold genes were confirmed via PCR.</b>                       |                 |                    |                                                                                                      |
| <b>Fold Change</b>                                                         | <b>p-value</b>  | <b>Gene Symbol</b> | <b>Description</b>                                                                                   |
| 5.74                                                                       | 0.001506        | BHLHE40            | basic helix-loop-helix family, member e40<br>G protein-coupled receptor, family C, group 5,          |
| 5.55                                                                       | 0.00248         | GPRC5A             | member A                                                                                             |
| 5.24                                                                       | 0.000119        | SKIL               | SKI-like oncogene                                                                                    |
|                                                                            |                 |                    | <b>ADAM metallopeptidase with thrombospondin</b>                                                     |
| <b>5.17</b>                                                                | <b>0.00107</b>  | <b>ADAMTS1</b>     | <b>type 1 motif, 1</b><br>serpin peptidase inhibitor, clade E (nexin,                                |
| 4.95                                                                       | 0.000125        | SERPINE1           | plasminogen activator inhibitor type 1), member 1                                                    |
| 4.88                                                                       | 0.000212        | ERRFI1             | ERBB receptor feedback inhibitor 1                                                                   |
| 4.04                                                                       | 0.002231        | PLK2               | polo-like kinase 2                                                                                   |
| 3.8                                                                        | 0.000533        | SOCS3              | suppressor of cytokine signaling 3                                                                   |
| 3.78                                                                       | 0.002578        | HES1               | hairy and enhancer of split 1, (Drosophila)                                                          |
| 3.74                                                                       | 0.003196        | NR4A1              | nuclear receptor subfamily 4, group A, member 1<br>solute carrier family 20 (phosphate transporter), |
| 3.6                                                                        | 0.000472        | SLC20A1            | member 1                                                                                             |
| 3.59                                                                       | 0.000004        | SNAI1              | snail homolog 1 (Drosophila)<br>histone-lysine N-methyltransferase, H3 lysine-79                     |
| 3.57                                                                       | 0.000785        | LOC510442          | specific-like                                                                                        |
| <b>3.52</b>                                                                | <b>0.003264</b> | <b>SMAD7</b>       | <b>SMAD family member 7</b>                                                                          |

|      |          |           |                                                     |
|------|----------|-----------|-----------------------------------------------------|
|      |          |           | v-ets erythroblastosis virus E26 oncogene homolog 1 |
| 3.49 | 0.000102 | ETS1      | (avian)                                             |
| 3.45 | 0.000239 | TBX3      | T-box transcription factor                          |
| 3.32 | 0.135103 | MIR125B-1 | microRNA mir-125b-1                                 |
|      |          |           | nuclear factor of activated T-cells, cytoplasmic,   |
| 3.31 | 0.000259 | NFATC2    | calcineurin-dependent 2                             |
| 3.24 | 0.00011  | JUNB      | jun B proto-oncogene                                |
|      |          | MMP3;     | matrix metalloproteinase 3 (stromelysin 1,          |
| 3.24 | 0.017875 | BT.18504  | progelatinase)                                      |
| 3.19 | 0.00089  | RGS16     | regulator of G-protein signaling 16                 |
| 3.13 | 0.006479 | TRIB1     | tribbles homolog 1 (Drosophila)                     |
| 2.95 | 0.006842 | FOS       | FBJ murine osteosarcoma viral oncogene homolog      |
| 2.93 | 0.001188 | KIAA1199  | KIAA1199 ortholog                                   |
|      |          |           | v-ets erythroblastosis virus E26 oncogene homolog 2 |
| 2.93 | 0.003141 | ETS2      | (avian)                                             |
| 2.9  | 0.001937 | NR4A3     | nuclear receptor subfamily 4, group A, member 3     |
| 2.8  | 0.000079 | LGALS1    | lectin, galactoside-binding-like                    |
| 2.78 | 0.000262 | IL1R1     | interleukin 1 receptor, type I                      |
| 2.77 | 0.000392 | SERTAD2   | SERTA domain containing 2                           |
| 2.74 | 0.000087 | TXNRD1    | thioredoxin reductase 1                             |
| 2.73 | 0.00073  | FOSB      | FBJ murine osteosarcoma viral oncogene homolog B    |
|      |          |           | nuclear factor of activated T-cells, cytoplasmic,   |
| 2.72 | 0.001385 | NFATC1    | calcineurin-dependent 1                             |
| 2.72 | 0.000404 | SPRY2     | sprouty homolog 2 (Drosophila)                      |
| 2.71 | 0.000975 | MT2A      | metallothionein 2A                                  |
| 2.7  | 0.00032  | VASN      | vasorin                                             |
| 2.7  | 0.002364 | ARC       | activity-regulated cytoskeleton-associated protein  |

|             |                 |              |                                                                                                 |
|-------------|-----------------|--------------|-------------------------------------------------------------------------------------------------|
| 2.69        | 0.000272        | TMEM2        | transmembrane protein 2<br><b>integrin, alpha 2 (CD49B, alpha 2 subunit of VLA-2</b>            |
| <b>2.68</b> | <b>0.010509</b> | <b>ITGA2</b> | <b>receptor)</b>                                                                                |
| 2.67        | 0.000202        | LMCD1        | LIM and cysteine-rich domains 1<br>tumor necrosis factor receptor superfamily, member           |
| 2.66        | 0.000265        | TNFRSF11B    | 11b                                                                                             |
| 2.59        | 0.000507        | TGIF1        | TGFB-induced factor homeobox 1                                                                  |
| 2.56        | 0.010229        | MIR221       | microRNA mir-221                                                                                |
| 2.51        | 0.000161        | KLF10        | Kruppel-like factor 10<br>BTB and CNC homology 1, basic leucine zipper                          |
| 2.48        | 0.000166        | BACH1        | transcription factor 1<br>jumonji C domain containing histone demethylase 1                     |
| 2.44        | 0.000114        | JHDM1D       | homolog D (S. cerevisiae)                                                                       |
| 2.41        | 0.581637        | LOC100337093 | zinc finger protein 75D-like<br>solute carrier family 2 (facilitated glucose transporter),      |
| 2.4         | 0.001035        | SLC2A1       | member 1                                                                                        |
| 2.4         | 0.00028         | BAIAP2       | BAI1-associated protein 2<br>ULBP27;<br>ULBP9; UL16-binding protein 27; UL16-binding protein 9; |
| 2.4         | 0.017899        | LOC783508    | UL16-binding protein 27-like<br>UDP-GlcNAc:betaGal beta-1,3-N-                                  |
| 2.38        | 0.000425        | B3GNT7       | acetylglucosaminyltransferase 7                                                                 |
| 2.37        | 0.000022        | PELI1        | pellino homolog 1 (Drosophila)                                                                  |
| 2.36        | 0.000684        | CSRNP1       | cysteine-serine-rich nuclear protein 1                                                          |
| 2.35        | 0.002035        | CDA          | cytidine deaminase                                                                              |
| <b>2.34</b> | <b>0.006135</b> | <b>BMP2</b>  | <b>bone morphogenetic protein 2</b>                                                             |
| 2.33        | 0.000063        | SGK1         | serum/glucocorticoid regulated kinase 1                                                         |

|      |          |         |                                                                                                         |
|------|----------|---------|---------------------------------------------------------------------------------------------------------|
| 2.32 | 0.001482 | PHF13   | PHD finger protein 13                                                                                   |
| 2.32 | 0.001809 | BCL2L1  | BCL2-like 1                                                                                             |
| 2.31 | 0.079327 | ULBP21  | UL16 binding protein 21                                                                                 |
| 2.31 | 0.000638 | EPHA2   | EPH receptor A2                                                                                         |
| 2.3  | 0.000191 | IER3    | immediate early response 3                                                                              |
| 2.3  | 0.000797 | MAP3K8  | mitogen-activated protein kinase kinase kinase 8                                                        |
| 2.27 | 0.006821 | FOSL1   | FOS-like antigen 1                                                                                      |
| 2.24 | 0.000809 | SDC4    | syndecan 4                                                                                              |
| 2.23 | 0.004424 | PLAUR   | plasminogen activator, urokinase receptor<br>solute carrier family 2 (facilitated glucose transporter), |
| 2.22 | 0.000698 | SLC2A3  | member 3                                                                                                |
| 2.22 | 0.004464 | DUSP5   | dual specificity protein phosphatase 5-like                                                             |
| 2.22 | 0.000751 | BDKRB2  | bradykinin receptor B2                                                                                  |
| 2.21 | 0.006271 | ZFAND2A | zinc finger, AN1-type domain 2A                                                                         |
| 2.21 | 0.003645 | MT1A    | metallothionein-1A                                                                                      |
| 2.21 | 0.000667 | SRXN1   | sulfiredoxin 1                                                                                          |
| 2.2  | 0.031222 | MIR23A  | microRNA mir-23a                                                                                        |
| 2.18 | 0.018505 | CISH    | cytokine inducible SH2-containing protein                                                               |
| 2.17 | 0.000414 | TGFB1   | transforming growth factor, beta 1                                                                      |
| 2.16 | 0.000141 | TIPARP  | TCDD-inducible poly(ADP-ribose) polymerase<br>integrin, alpha 5 (fibronectin receptor, alpha            |
| 2.15 | 0.002326 | ITGA5   | polypeptide)                                                                                            |
| 2.14 | 0.002927 | SNCAIP  | synuclein, alpha interacting protein                                                                    |
| 2.14 | 0.013006 | BDKRB1  | bradykinin receptor B1                                                                                  |
| 2.14 | 0.012767 | FOSL2   | FOS-like antigen 2                                                                                      |
| 2.13 | 0.000085 | NAB2    | NGFI-A binding protein 2 (EGR1 binding protein 2)                                                       |
| 2.13 | 0.001151 | SLC7A2  | solute carrier family 7 (cationic amino acid                                                            |

|             |                 |               |                                                                                    |
|-------------|-----------------|---------------|------------------------------------------------------------------------------------|
|             |                 |               | transporter, y+ system), member 2                                                  |
|             |                 |               | splA/ryanodine receptor domain and SOCS box                                        |
| 2.13        | 0.003142        | SPSB1         | containing 1                                                                       |
| 2.12        | 0.000012        | FGF2          | fibroblast growth factor 2 (basic)                                                 |
| 2.1         | 0.001182        | KLF3          | Kruppel-like factor 3 (basic)                                                      |
| 2.09        | 0.000367        | ELL2          | elongation factor, RNA polymerase II, 2<br>chromosome 23 open reading frame, human |
| 2.09        | 0.001579        | PXDC1         | C6orf145                                                                           |
| 2.08        | 0.001172        | DUSP4         | dual specificity phosphatase 4<br>v-myc myelocytomatosis viral oncogene homolog    |
| 2.08        | 0.000025        | MYC           | (avian)<br>prostaglandin-endoperoxide synthase 2                                   |
| 2.07        | 0.009514        | PTGS2         | (prostaglandin G/H synthase and cyclooxygenase)                                    |
| 2.07        | 0.009874        | PMEPA1        | prostate transmembrane protein, androgen induced 1                                 |
| 2.06        | 0.00249         | KDM6B         | lysine (K)-specific demethylase 6B                                                 |
| 2.05        | 0.001335        | EMP1          | epithelial membrane protein 1                                                      |
| 2.05        | 0.008185        | PKNOX1        | PBX/knotted 1 homeobox 1                                                           |
| 2.04        | 0.005312        | FMNL3         | formin-like 3<br>aTP-binding cassette, sub-family C (CFTR/MRP),                    |
| 2.04        | 0.185782        | LOC100298891  | member 4-like                                                                      |
| 2.02        | 0.003689        | GADD45B       | growth arrest and DNA-damage-inducible, beta                                       |
| 2.02        | 0.003098        | ZFP36         | zinc finger protein 36, C3H type, homolog (mouse)                                  |
| 2.02        | 0.000177        | EPAS1         | endothelial PAS domain protein 1                                                   |
| 2.01        | 0.000746        | PPM1D         | protein phosphatase, Mg <sup>2+</sup> /Mn <sup>2+</sup> dependent, 1D              |
| 2.01        | 0.000708        | RUNX1         | runt-related transcription factor 1                                                |
| <b>1.92</b> | <b>0.018369</b> | <b>TRPV4*</b> | <b>transient receptor potential cation channel,</b>                                |



**subfamily V, member 4**

**1.58 0.010405 LOXL4\* lysyl oxidase-like 4**

1.13 0.299411 LOXL2\* lysyl oxidase-like 2

\*Despite not meeting the 2-fold cutoff, TRPV4 expression was confirmed via PCR, as TRPV4-specific inhibitors were investigated in these studies. Similarly, despite not meeting the 2-fold and  $p < 0.05$  cutoffs, LOX protein expression was examined via PCR as LOXL2 was used in neocartilage treatment. The microarray results of these genes are presented here for comparison purposes.

|       |          |              |                                                                                        |
|-------|----------|--------------|----------------------------------------------------------------------------------------|
| -2    | 0.033441 | CCDC82       | coiled-coil domain containing 82<br>spindle and kinetochore associated complex subunit |
| -2.01 | 0.219315 | SKA3         | 3                                                                                      |
| -2.03 | 0.053819 | MAB21L2      | mab-21-like 2 (C. elegans)                                                             |
| -2.05 | 0.084542 | LOC100140123 | zinc finger protein 75A-like                                                           |
| -2.05 | 0.091261 | CENPA        | centromere protein A                                                                   |
| -2.05 | 0.004352 | RBM11        | RNA binding motif protein 11                                                           |
| -2.08 | 0.0093   | MAGEF1       | melanoma antigen family F, 1                                                           |
| -2.15 | 0.096388 | FAM76A       | family with sequence similarity 76, member A                                           |
| -2.23 | 0.003164 | ZC2HC1A      | zinc finger, C2HC-type containing 1A                                                   |

**Supplemental Table 7: Structural properties of tested dumbbell-shaped samples in the parallel direction.**

Shown are fold-increases in structural stiffness and structural strength of treated samples over control.

| <b>Supplemental Table 7. Structural Properties of Tested Dumbbell-shaped Samples in the Parallel Direction.</b> |                |     |     |     |                |     |  |
|-----------------------------------------------------------------------------------------------------------------|----------------|-----|-----|-----|----------------|-----|--|
|                                                                                                                 | InTenS studies |     |     |     | CoTenS studies |     |  |
| CABC                                                                                                            | -              | -   | -   | +   | +              | +   |  |
| LOXL2                                                                                                           | -              | -   | +   | +   | +              | +   |  |
| TGFβ1                                                                                                           | -              | +   | +   | +   | +              | +   |  |
| InTenS                                                                                                          | +              | +   | +   | +   | -              | -   |  |
| CoTenS                                                                                                          | -              | -   | -   | -   | -              | +   |  |
| Structural stiffness<br>(fold-changes with respect to control) [(N/mm)/(N/mm)]                                  | 1.3            | 2.2 | 2.1 | 2.1 | 2.5            | 5.5 |  |
| Structural strength<br>(fold-changes with respect to control) [N/N]                                             | 1.3            | 1.8 | 2.1 | 1.8 | 3.3            | 5.5 |  |
